# Supplementary material for: Optogenetics-inspired manipulation of synaptic memory using all-optically controlled memristors
Source: Royal Society of Chemistry journal article supplement (doi:10.1039/d3nr00900a), 2023-01-01
Supplement: d3nr00900a1.pdf [file d3nr00900a1.pdf]

## Supporting Information

### Optogenetics-inspired manipulation of synaptic memory using All-Optically Controlled memristors

Qihao Sun,<sup>‡,a,b,c</sup> Zhecheng Guo,<sup>‡,a</sup> Xiaojian Zhu,<sup>\*,b,c</sup> Qian Jiang,<sup>b,c,d</sup> Huiyuan Liu,<sup>b,c,e</sup> Xuerong Liu,<sup>b,c</sup>  
Cui Sun,<sup>b,c</sup> Yuejun Zhang,<sup>\*,a</sup> Liu Wu,<sup>b,c,e</sup> and Run-Wei Li<sup>b,c</sup>

<sup>a</sup>*Faculty of Electrical Engineering and Computer Science, Ningbo University, Ningbo 315211, P. R. China. E-mail: zhangyuejun@nbu.edu.cn*

<sup>b</sup>*CAS Key Laboratory of Magnetic Materials and Devices, Ningbo Institute of Materials Technology and Engineering, Chinese Academy of Sciences, Ningbo 315201, P. R. China. E-mail: zhuxj@nimte.ac.cn*

<sup>c</sup>*Zhejiang Province Key Laboratory of Magnetic Materials and Application Technology, Ningbo Institute of Materials Technology and Engineering, Chinese Academy of Sciences, Ningbo 315201, P. R. China.*

<sup>d</sup>*College of Materials Science and Opto-Electronic Technology, University of Chinese Academy of Sciences, Beijing 100049, P. R. China.*

<sup>e</sup>*Nano Science and Technology Institute, University of Science and Technology of China, Suzhou 215123, P. R. China.*

<sup>‡</sup>*These authors contributed equally to this work.*

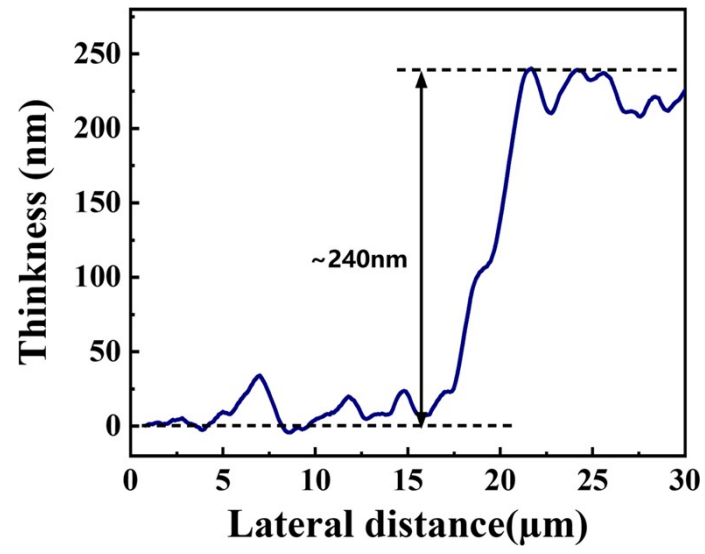

**Fig. S1** The thickness of  $\text{Cs}_2\text{AgBiBr}_6$  thin film.

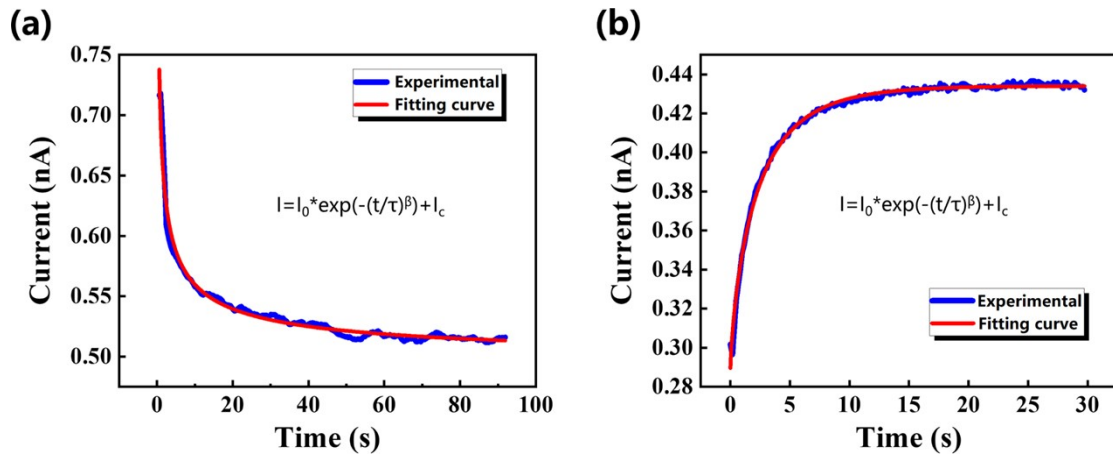

**Fig. S2** Fitting result curve of current decay region in Fig. 2b (a) and Fig. 2c (b) after light was turned off.

The stretched exponential function used for fitting the attenuation region.

$$I = I_0 \cdot \exp(-(t/\tau)^\beta) + I_c \quad (1)$$

Where  $I_0$  is a prefactor and  $I_c$  represents the background current, about 0.52nA.  $\tau$  and  $\beta$  represent the characteristic decay time constant and the stretch index, respectively.

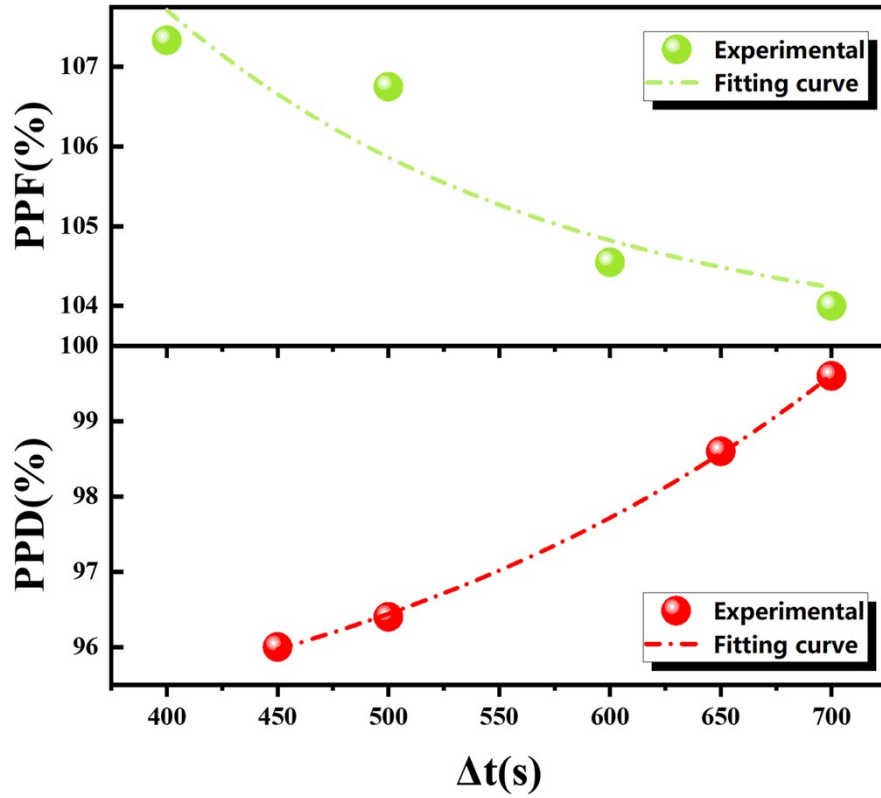

**Fig. S3** The variation of PPF and PPD index with the interval of light pulse pairs ( $\Delta t$ ).

The fitting function:

$$y = y_0 + A \cdot \exp(-\Delta t / \tau) \quad (2)$$

where  $A$  and  $\tau$  are the initial facilitation magnitude and the characteristic relaxation time of the decay term, respectively.

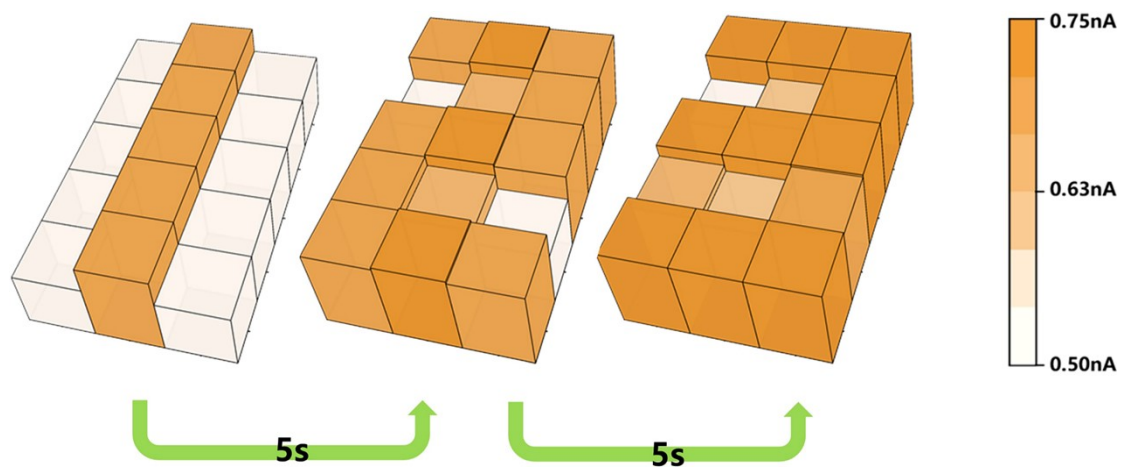

**Fig. S4** Current maps measured from the array after being illuminated by green lights, showing patterns of digits “1”, “2”and “3”.

(a)

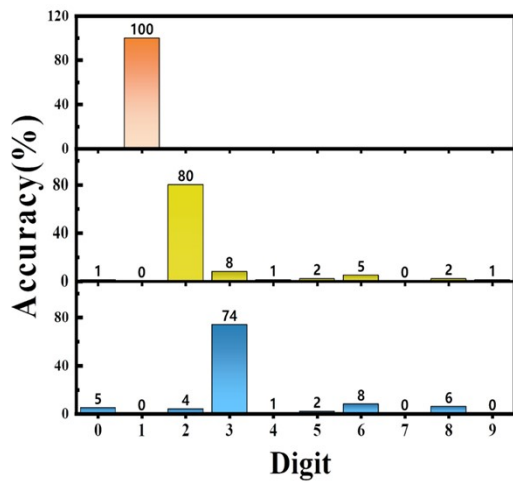

(b)

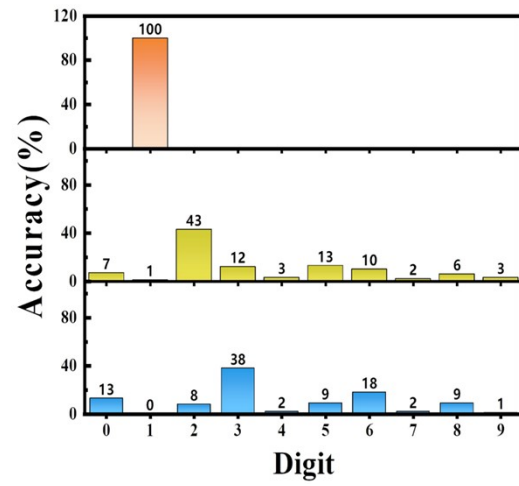

**Fig. S5** The recognition accuracy of the three digits identified by the artificial neural network after the array was processed by and green-red (a) and green light (b).

**Table. S1** Comparison between previously reported all-optical controlled memristors and this work.

| Device structure                           | Mechanisms                                                                                                       | Wavelength          | Photocurrent | Ref.      |
|--------------------------------------------|------------------------------------------------------------------------------------------------------------------|---------------------|--------------|-----------|
| Bi <sub>2</sub> O <sub>2</sub> Se/Graphene | The coexistence of photoconductive and bolometric effects; light-induced physical gas desorption and adsorption. | 365nm; 635nm        | ~1-10μA      | 1         |
| Ni/MAPbBr <sub>3</sub> -ZnO/Ni             | The increase and diffusion of photogenerated charge carriers.                                                    | 365nm; 520nm        | ~0.1-10μA    | 2         |
| Pyr-GDY/Gr/PbS                             | The strong photogating effect induced by Pyr-GDY and PbS QDs.                                                    | 450nm; 980nm        | ~1-10μA      | 3         |
| Au/Black Phosphorus/Au                     | The electron-hole pair generation after UV absorption; Oxygen adsorption on BP surface.                          | 280nm; 365nm        | ~1-10μA      | 4         |
| Au/Cs <sub>2</sub> AgBiBr <sub>6</sub> /Au | The electron detrapping and trapping in the defects.                                                             | 405nm; 532nm; 660nm | <1nA         | This work |

**References:**

1. C. M. Yang, T. C. Chen, D. Verma, L. J. Li, B. Liu, W. H. Chang and C. S. Lai, *Adv. Funct. Mater.*, 2020, **30**, 2001598.
2. S. Ge, F. Huang, J. He, Z. Xu, Z. Sun, X. Han, C. Wang, L. B. Huang and C. Pan, *Adv. Optical Mater.*, 2022, **10**, 2200409.
3. Y. X. Hou, Y. Li, Z. C. Zhang, J. Q. Li, D. H. Qi, X. D. Chen, J. J. Wang, B. W. Yao, M. X. Yu, T. B. Lu and J. Zhang, *ACS Nano*, 2021, **15**, 1497-1508.
4. T. Ahmed, S. Kuriakose, E. L. H. Mayes, R. Ramanathan, V. Bansal, M. Bhaskaran, S. Sriram and S. Walia, *Small*, 2019, **15**, e1900966.
